# Supplementary material
Source: PubMed Central journal article supplement (PMC5206898)

Table S1. All Food Names

| <b>Short name</b>    | <b>Full food name used in survey</b>                                |
|----------------------|---------------------------------------------------------------------|
| alfalfa              | Alfalfa sprouts                                                     |
| apple juice          | Apple juice                                                         |
| bacon                | Bacon                                                               |
| bagels               | Bagels                                                              |
| baked potatoe        | Baked potatoes                                                      |
| bananas              | Bananas                                                             |
| blueberries          | Blueberries                                                         |
| beans                | Beans or lentils                                                    |
| beef                 | Beef                                                                |
| beer                 | Beer                                                                |
| beets                | Beets                                                               |
| boiled potatoes      | Boiled potatoes                                                     |
| brown rice           | Brown rice                                                          |
| broccoli             | Broccoli                                                            |
| brownies             | Brownies                                                            |
| Brussels sprouts     | Brussels sprouts                                                    |
| butter               | Butter                                                              |
| cake                 | Cake                                                                |
| candy bar            | Candy bars, e.g. snickers, milky way, reeses                        |
| cantaloupe           | Cantaloupe                                                          |
| other carbonated bev | Carbonated beverages with sugar other than cola                     |
| carrots              | Carrots                                                             |
| cauliflower          | Cauliflower                                                         |
| cream cheese         | Cream cheese                                                        |
| celery               | Celery                                                              |
| chard greens         | Chard greens                                                        |
| cheese               | Cheese                                                              |
| chicken wo skin      | Chicken without skin                                                |
| chicken w skin       | Chicken with skin                                                   |
| chocolate            | Chocolate (bars or pieces) e.g. hershey's M&Ms                      |
| chowder              | Chowder                                                             |
| cider                | Cider                                                               |
| oatmeal              | Cooked oatmeal                                                      |
| coffee cake          | Coffee cake                                                         |
| coffee               | Coffee                                                              |
| cola                 | Coke, pepsi or other cola with sugar                                |
| cookies              | Cookies                                                             |
| corn                 | Corn                                                                |
| corn chips           | Corn chips                                                          |
| cottage cheese       | Cottage or ricotta cheese                                           |
| cracker              | Crackers, triskets, wheat thins                                     |
| cream                | Cream                                                               |
| cream soup           | Cream soup                                                          |
| cooked spinach       | Spinach, cooked                                                     |
| tuna                 | Canned tuna fish                                                    |
| dark bread           | Dark bread                                                          |
| dark meat fish       | Dark meat fish e.g. mackerel, salmon, sardines, bluefish, swordfish |
| donuts               | Doughnuts                                                           |
| eggs                 | Eggs                                                                |
| english muffin       | English muffins                                                     |

|                              |                                                                                   |
|------------------------------|-----------------------------------------------------------------------------------|
| fresh apples                 | Fresh apples                                                                      |
| French fries                 | French fried potatoes                                                             |
| fresh pears                  | Fresh pears                                                                       |
| garlic                       | Garlic                                                                            |
| grapefruit                   | Grapefruit                                                                        |
| grapefruit juice             | Grapefruit juice                                                                  |
| hamburger                    | Hamburger                                                                         |
| hotdogs                      | Hot dogs                                                                          |
| punch                        | Hawaiian punch                                                                    |
| ice cream                    | Ice cream                                                                         |
| jams                         | Jams, jellies, preserves, syrup, or honey                                         |
| kale                         | Kale greens                                                                       |
| lamb                         | Lamb                                                                              |
| lemonade                     | Lemonade                                                                          |
| lettuce                      | Iceberg or head lettuce                                                           |
| liquor                       | Liquor e.g. whiskey, gin                                                          |
| liver                        | Liver                                                                             |
| lobster                      | Lobster                                                                           |
| other low-cal carbonated bev | Low calorie carbonated beverages other than cola, e.g. diet 7-up, diet ginger ale |
| low-cal cola                 | Low calorie cola                                                                  |
| margarine                    | Margarine                                                                         |
| mashed potatoes              | Mashed potatoes                                                                   |
| mayonnaise                   | Mayonnaise or other creamy salad dressing                                         |
| mushrooms                    | Mushrooms                                                                         |
| mustard greens               | Mustard greens                                                                    |
| mustard                      | Mustard                                                                           |
| nuts                         | Nuts                                                                              |
| oil-vinegar dressing         | Oil and vinegar dressing e.g. Italian                                             |
| orange juice                 | Orange juice                                                                      |
| oranges                      | Oranges                                                                           |
| pancakes                     | Pancakes                                                                          |
| pasta                        | Pasta, e.g. spaghetti, noodles                                                    |
| peanut butter                | Peanut butter                                                                     |
| peas                         | Peas, or lima beans                                                               |
| pepper                       | Pepper (spice)                                                                    |
| pie                          | Pie                                                                               |
| popcorn                      | Popcorn                                                                           |
| pork                         | Pork                                                                              |
| potato chips                 | Potato chips                                                                      |
| processed meats              | Processed meats, e.g. sausage, salami, bologna etc                                |
| prunes                       | Prunes                                                                            |
| rolls                        | Rolls                                                                             |
| romain lettuce               | Romaine or leaf lettuce                                                           |
| raw spinach                  | Spinach, raw as in salad                                                          |
| red wine                     | Red wine                                                                          |
| salt                         | Salt                                                                              |
| string beans                 | String beans                                                                      |
| strawberries                 | Strawberries                                                                      |
| scallops                     | Scallops                                                                          |
| sour cream                   | Sour cream                                                                        |
| sherbet                      | Sherbet                                                                           |
| shrimp                       | Shrimp                                                                            |

|                |                        |
|----------------|------------------------|
| skim milk      | Skim or low fat milk   |
| soy            | Tofu or soybeans       |
| sweet roll     | Sweet roll             |
| tea            | Tea, not herbal        |
| tomato juice   | Tomato juice           |
| tomatoes       | Tomatoes               |
| tomato sauce   | Tomato sauce           |
| turkey wo skin | Turkey without skin    |
| turkey w skin  | Turkey with skin       |
| waffles        | Waffles                |
| watermelon     | Watermelon             |
| white bread    | White bread            |
| whole milk     | Whole milk             |
| white rice     | White rice             |
| white wine     | White wine             |
| yams           | Yams or sweet potatoes |
| yogurt         | Yogurt                 |
| squash         | Yellow (winter) squash |

**Table S2.** Spearman correlations between liking and intake of bitter, sweet, salty, sour and fatty foods

| Food                 | Taste Class  | % users | Median intake among users, servings/d | All      |          | HPFS     |          | NHS      |          |
|----------------------|--------------|---------|---------------------------------------|----------|----------|----------|----------|----------|----------|
|                      |              |         |                                       | <i>r</i> | <i>P</i> | <i>r</i> | <i>P</i> | <i>r</i> | <i>P</i> |
| red wine             | bitter, sour | 49      | 0.43                                  | 0.76     | <0.0001  | 0.81     | <0.0001  | 0.68     | <0.0001  |
| coffee               | bitter       | 66      | 2.50                                  | 0.73     | <0.0001  | 0.66     | <0.0001  | 0.78     | <0.0001  |
| liquor               | bitter       | 33      | 0.14                                  | 0.61     | <0.0001  | 0.69     | <0.0001  | 0.50     | <0.0001  |
| white wine           | sour         | 47      | 0.14                                  | 0.61     | <0.0001  | 0.64     | <0.0001  | 0.57     | <0.0001  |
| beer                 | bitter       | 33      | 0.14                                  | 0.60     | <0.0001  | 0.59     | <0.0001  | 0.48     | <0.0001  |
| yogurt               | sour         | 66      | 0.28                                  | 0.50     | <0.0001  | 0.42     | <0.0001  | 0.49     | <0.0001  |
| Brussels sprouts     | bitter       | 30      | 0.07                                  | 0.49     | <0.0001  | 0.57     | <0.0001  | 0.49     | <0.0001  |
| orange juice         | sour         | 49      | 0.43                                  | 0.45     | <0.0001  | 0.49     | <0.0001  | 0.39     | <0.0001  |
| chard greens‡        | bitter       | 19      | 0.07                                  | 0.43     | <0.0001  | 0.44     | <0.0001  | 0.41     | <0.0001  |
| cola¶                | sweet        | 33      | 0.14                                  | 0.41     | <0.0001  | 0.36     | 0.0002   | 0.45     | <0.0001  |
| salt‡‡               | salty        | 56      | 0.26                                  | 0.40     | <0.0001  | 0.38     | 0.0001   | 0.43     | <0.0001  |
| jams                 | sweet        | 69      | 0.14                                  | 0.39     | <0.0001  | 0.41     | <0.0001  | 0.34     | <0.0001  |
| popcorn              | salty        | 56      | 0.14                                  | 0.39     | <0.0001  | 0.36     | 0.0002   | 0.42     | <0.0001  |
| processed meats      | salty, fatty | 47      | 0.14                                  | 0.39     | <0.0001  | 0.37     | 0.0001   | 0.39     | <0.0001  |
| chicken with skin*** | fatty        | 40      | 0.14                                  | 0.38     | <0.0001  | 0.41     | <0.0001  | 0.33     | <0.0001  |
| margarine            | fatty        | 32      | 0.43                                  | 0.38     | <0.0001  | 0.44     | <0.0001  | 0.36     | <0.0001  |
| kale greens‡         | bitter       | 19      | 0.07                                  | 0.35     | <0.0001  | 0.29     | 0.005    | 0.37     | 0.0001   |
| sour cream           | sour         | 54      | 0.07                                  | 0.35     | <0.0001  | 0.23     | 0.03     | 0.41     | <0.0001  |
| tomato juice         | salty        | 27      | 0.14                                  | 0.35     | <0.0001  | 0.23     | 0.02     | 0.39     | <0.0001  |
| mustard              | bitter, sour | 71      | 0.14                                  | 0.34     | 0.0003   | 0.34     | 0.0003   | --       | --       |
| other SCB¶           | sweet        | 33      | 0.14                                  | 0.34     | <0.0001  | 0.25     | 0.01     | 0.40     | <0.0001  |
| grapefruit‡          | bitter, sour | 29      | 0.07                                  | 0.32     | <0.0001  | 0.29     | 0.0028   | 0.34     | <0.0001  |
| mustard greens‡      | bitter       | 19      | 0.07                                  | 0.32     | <0.0001  | 0.33     | 0.005    | 0.31     | 0.004    |
| butter               | fatty        | 59      | 0.43                                  | 0.31     | <0.0001  | 0.31     | <0.0001  | 0.32     | <0.0001  |
| chocolates           | sweet        | 78      | 0.14                                  | 0.31     | <0.0001  | 0.30     | 0.002    | 0.34     | <0.0001  |
| mayonnaise           | fatty        | 76      | 0.14                                  | 0.31     | <0.0001  | 0.21     | 0.03     | 0.41     | <0.0001  |
| grapefruit juice‡    | bitter, sour | 29      | 0.07                                  | 0.30     | <0.0001  | 0.29     | 0.0031   | 0.28     | 0.0008   |
| turkey with skin***  | fatty        | 40      | 0.14                                  | 0.30     | <0.0001  | 0.27     | 0.007    | 0.31     | 0.0003   |
| bacon                | salty, fatty | 54      | 0.07                                  | 0.28     | <0.0001  | 0.27     | 0.006    | 0.27     | 0.002    |
| cider¶¶              | sour         | 17      | 0.07                                  | 0.28     | <0.0001  | 0.27     | 0.005    | 0.28     | 0.0012   |
| doughnuts            | sweet, fatty | 22      | 0.07                                  | 0.28     | <0.0001  | 0.18     | 0.07     | 0.37     | <0.0001  |
| ice-cream            | sweet        | 54      | 0.07                                  | 0.28     | <0.0001  | 0.28     | 0.005    | 0.26     | 0.002    |
| oranges              | sour         | 63      | 0.14                                  | 0.27     | <0.0001  | 0.38     | <0.0001  | 0.18     | 0.04     |
| candy bars           | sweet        | 49      | 0.14                                  | 0.26     | <0.0001  | 0.20     | 0.05     | 0.31     | 0.0002   |
| corn chips‡‡         | salty        | 71      | 0.14                                  | 0.24     | 0.0002   | 0.23     | 0.02     | 0.25     | 0.003    |
| potato chips‡‡       | salty, fatty | 71      | 0.14                                  | 0.24     | 0.0001   | 0.24     | 0.01     | 0.24     | 0.004    |
| French fries         | salty, fatty | 54      | 0.07                                  | 0.23     | 0.0003   | 0.37     | 0.0001   | 0.12     | 0.18     |
| hot dogs             | salty, fatty | 53      | 0.07                                  | 0.23     | 0.0003   | 0.26     | 0.008    | 0.24     | 0.006    |
| sweet roll           | sweet        | 42      | 0.07                                  | 0.23     | 0.0003   | 0.22     | 0.03     | 0.26     | 0.002    |
| hamburger            | fatty        | 45      | 0.07                                  | 0.22     | 0.0006   | 0.31     | 0.001    | 0.11     | 0.21     |
| nuts                 | salty        | 86      | 0.43                                  | 0.22     | 0.0006   | 0.36     | 0.0002   | 0.14     | 0.10     |
| cake                 | sweet        | 43      | 0.07                                  | 0.20     | 0.002    | 0.20     | 0.04     | 0.23     | 0.007    |
| oil/vinegar dressing | sour         | 87      | 0.43                                  | 0.19     | 0.004    | 0.29     | 0.003    | 0.10     | 0.24     |
| pie                  | sweet        | 39      | 0.07                                  | 0.18     | 0.005    | 0.15     | 0.14     | 0.22     | 0.009    |
| brownies**           | sweet        | 67      | 0.14                                  | 0.15     | 0.02     | 0.13     | 0.18     | 0.20     | 0.02     |
| cookies**            | sweet        | 67      | 0.14                                  | 0.15     | 0.02     | 0.22     | 0.03     | 0.14     | 0.10     |
| lemonade§            | bitter, sour | 27      | 0.14                                  | 0.09     | 0.15     | -0.05    | 0.64     | 0.19     | 0.02     |
| Hawaiian punch§      | sweet        | 27      | 0.14                                  | 0.08     | 0.23     | -0.06    | 0.60     | 0.15     | 0.09     |
| cream                | fatty        | 28      | 0.07                                  | 0.01     | 0.83     | 0.07     | 0.53     | -0.01    | 0.89     |

NHS2: Nurses' Health Study 2; HPFS: Health Professionals Follow up Study; SCB: sugar-carbonated beverages

† Intake of grapefruit/juice  
‡ Intake of dark greens  
§ Intake of Hawaiian punch/lemonade  
|| Available for HPFS only  
¶ Intake of sugar-carbonated beverages  
\*\* Intake of brownies/cookies  
†† Added salt  
‡‡ Intake of corn/potato chips  
||| Intake reported in 1991 (NHS) and 1990 (HPFS)  
¶¶ Intake of apple/cider juice  
\*\*\* Intake of chicken/turkey with skin

**Figure S1.** Distributions and scatter plot correlation matrices of food-based taste intensity scores and corresponding food-liking and food-intake scores. Scores are derived from the mean trait (intensity, liking or intake) value of the top bitter (A), sweet (B), sour (C), salty (D), or fatty (E) foods listed in Tables 2-6, respectively. Only Pearson correlations are shown (see Tables 2-6 for relevant Spearman correlations).

A. Bitter

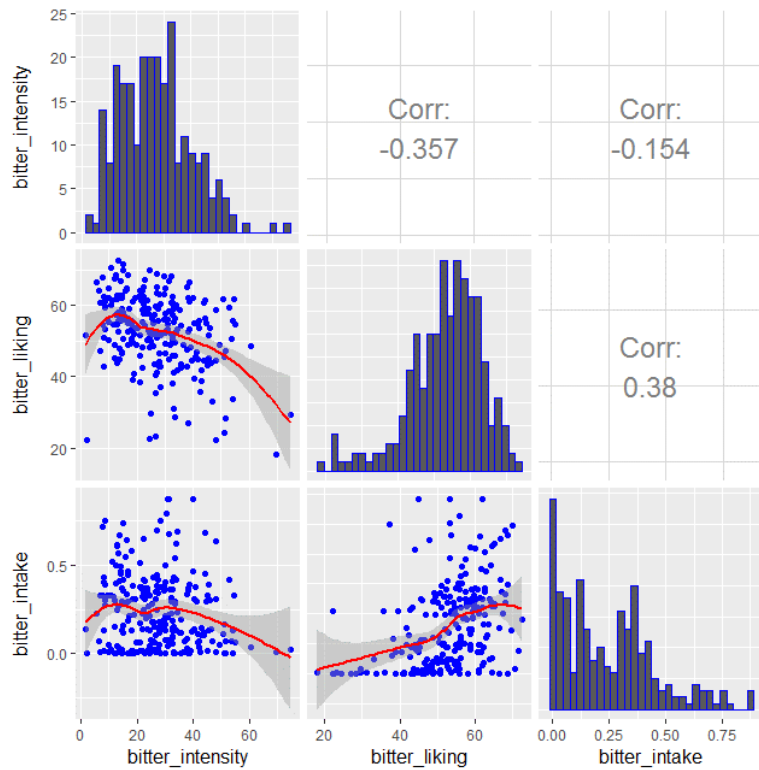

B. Sweet

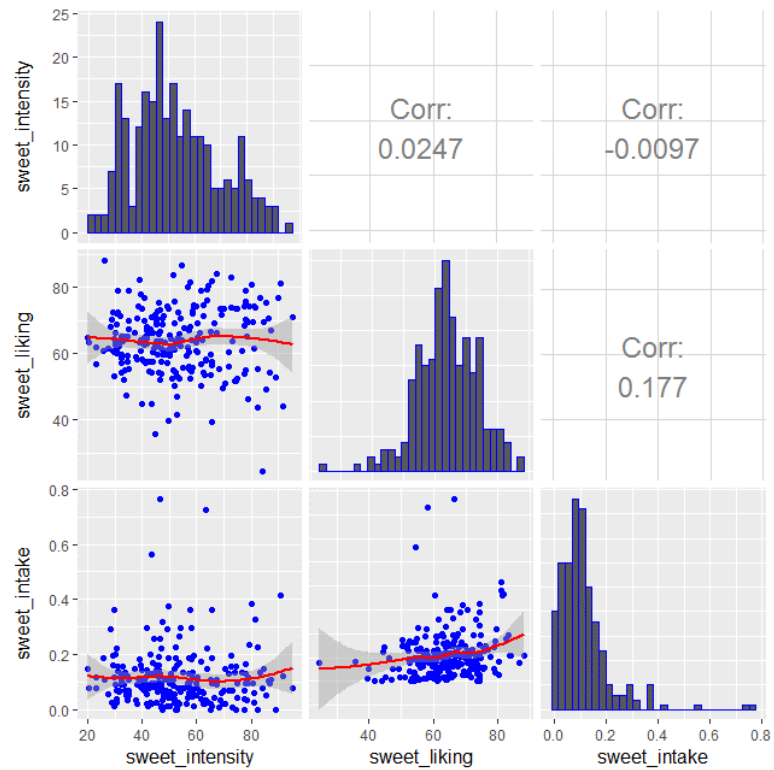

### C. Sour

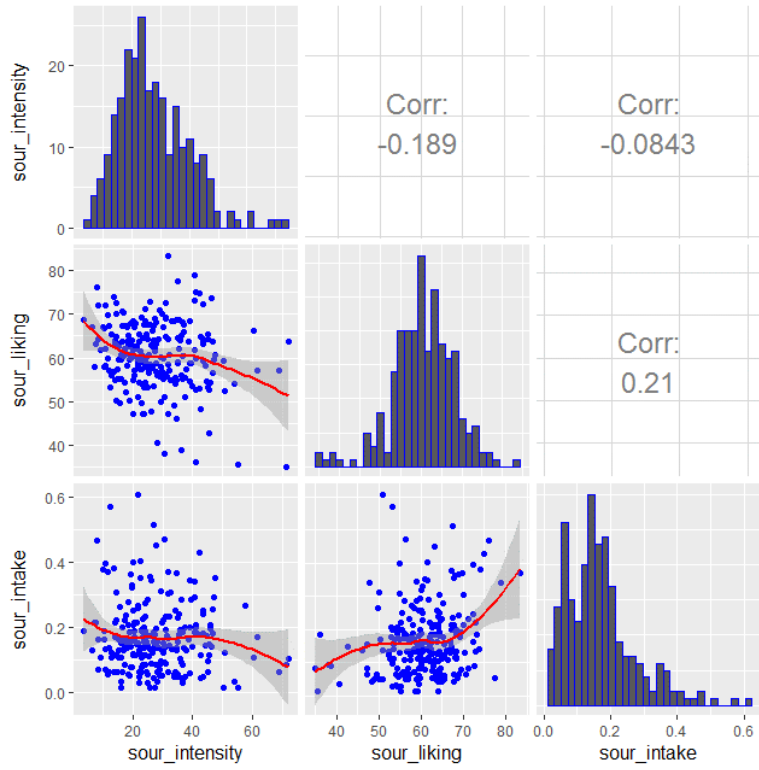

### D. Salty

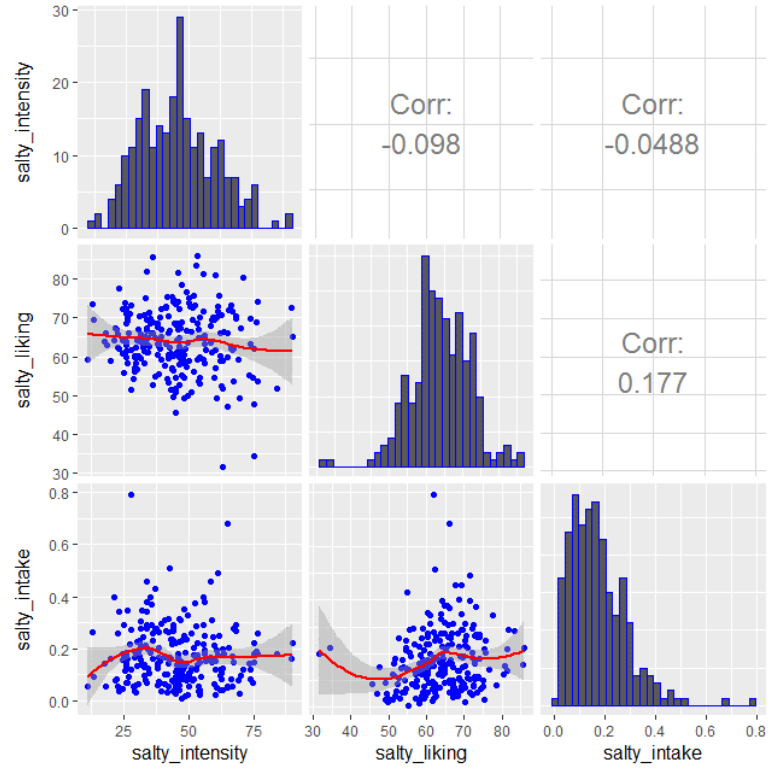

### E. Fatty

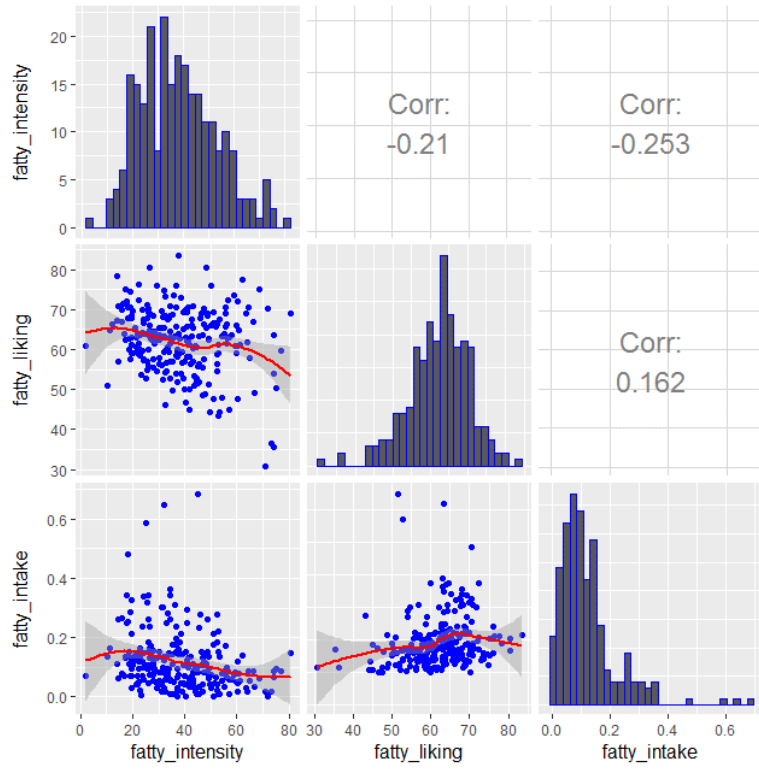

Supplement: NIHMS838333-supplement.pdf [file NIHMS838333-supplement.pdf]
